# Supplementary material
Source: PubMed Central journal article supplement (PMC10121862)
Supplement: NIHMS1876192-supplement-1.pdf [file NIHMS1876192-supplement-1.pdf]

**Supplemental Table 1: Outcome Data by Oxygen Amount**

| Mean $\pm$ S.D.<br>[Range]                                      | Entire Study<br>Population<br>(n=245) | $\leq 0.125$ LPM<br>(n=73)   | $>0.125$ and<br>$<0.5$ LPM<br>(n=82) | $\geq 0.5$ and<br>$<1.0$ LPM<br>(n=70) | $\geq 1.0$ LPM<br>(n=20)        | P<br>value       |
|-----------------------------------------------------------------|---------------------------------------|------------------------------|--------------------------------------|----------------------------------------|---------------------------------|------------------|
| <b>Number of questionnaires (#;</b><br>n=245)                   | 2.1 $\pm$ 2.0<br>[1, 18]              | 1.8 $\pm$ 1.3<br>[1, 8]      | 2.1 $\pm$ 2.5<br>[1, 18]             | 2.2 $\pm$ 1.7<br>[1, 9]                | 3.0 $\pm$ 2.4<br>[1, 11]        | 0.13             |
| <b>Mean age at time of assessments</b><br>(months; n=245)       | 9.7 $\pm$ 12.2<br>[0.4, 165.4]        | 7.6 $\pm$ 5.0<br>[0.5, 28.4] | 8.8 $\pm$ 6.8<br>[0.4, 46.8]         | 9.2 $\pm$ 6.8<br>[0.7, 40.6]           | 22.1 $\pm$ 35.6<br>[3.2, 165.4] | <b>&lt;0.001</b> |
| <b>Any emergency department visit</b><br>(% yes; n=242)         | 28.9%                                 | 32.0%                        | 26.3%                                | 31.4%                                  | 20.0%                           | 0.66             |
| <b>Any hospital admission</b> (% yes;<br>n=243)                 | 23.0%                                 | 23.6%                        | 21.0%                                | 25.7%                                  | 20.0%                           | 0.90             |
| <b>Any systemic steroid use</b> (% yes;<br>n=243)               | 25.5%                                 | 20.8%                        | 22.2%                                | 30.0%                                  | 40.0%                           | 0.24             |
| <b>Any antibiotic use</b> (% yes; n=243)                        | 29.6%                                 | 31.9%                        | 25.9%                                | 28.6%                                  | 40.0%                           | 0.62             |
| <b>Any cough and/or wheeze</b> (% yes;<br>n=243)                | 39.9%                                 | 33.3%                        | 39.5%                                | 47.1%                                  | 40.0%                           | 0.42             |
| <b>Any rescue medication use</b> (% yes;<br>n=241)              | 33.6%                                 | 23.9%                        | 35.8%                                | 40.6%                                  | 35.0%                           | 0.20             |
| <b>Any shortness of breath with<br/>activity</b> (% yes; n=239) | 20.9%                                 | 21.1%                        | 18.5%                                | 20.9%                                  | 30.0%                           | 0.73             |
| <b>Any nighttime symptoms</b> (% yes;<br>n=242)                 | 19.4%                                 | 15.2%                        | 18.8%                                | 22.9%                                  | 25.0%                           | 0.63             |
